# Supplementary material for: Nitrogen-enriched porous carbon supported Pd-nanoparticles as an efficient catalyst for the transfer hydrogenation of alkenes
Source: Royal Society of Chemistry journal article supplement (doi:10.1039/c8nj03656j), 2018-01-01
Supplement: c8nj03656j1.pdf [file c8nj03656j1.pdf]

## **New Journal of Chemistry**

ELECTRONIC SUPPORTING INFORMATION (ESI)

### **Nitrogen-riched porous carbon supported Pd-nanoparticles as an efficient catalyst for the transfer hydrogenation of alkenes**

Jie Li‡, Xin Zhou‡, Ning-Zhao Shang\*, Cheng Feng, Shu-Tao Gao, Chun Wang\*

College of Science, Hebei Agricultural University, Baoding 071001, China

## 1.1 Chemicals and materials

Urea (A.R.), glucose (A.R.), palladium chloride ( $\text{PdCl}_2$ , A.R.), formic acid (FA, A.R.), sodium formate (SF,  $\text{HCOONa}$ , A.R.), sodium borohydride ( $\text{NaBH}_4$ , A.R.), and ammonium formate (A.R.), ethanol ( $\text{C}_2\text{H}_5\text{OH}$ , A.R.) were purchased from Huaxin Co., Ltd (Baoding, China). All materials were used as received without further purification.

## 1.2 Characterizations

The size and morphology of the samples were observed using transmission electron microscopy (TEM) using a JEOL model JEM-2011JHR at 200 kV. The X-ray diffraction (XRD) patterns of the samples were recorded with a Rigaku D/max 2500 X-ray diffractometer using  $\text{Cu K}\alpha$  radiation (40 kV, 150 mA) in the range  $2\theta = 5^\circ$ - $80^\circ$ . The surface area, total pore volume and pore size distribution of the samples were measured at 77 K using nitrogen adsorption with V-Sorb 2800P volumetric adsorption equipment (Jinaipu, China). X-ray photoelectron spectroscopy (XPS) was performed with a PHI 1600 spectroscope using a  $\text{Mg K}\alpha$  X-ray source for excitation. The Pd loading in the materials was analyzed by a T. J. A.ICP-9000 type inductively coupled plasma atomic emission spectroscopy (ICP-AES) instrument. Fourier transform infrared (FTIR) spectra were recorded with a Bruker VERTEX 700 spectrometer between 4000 and 500  $\text{cm}^{-1}$ . GC analyses were carried out on a Shimadzu GC-2014-C series gas chromatograph (Shimadzu, Japan) equipped with a flame ionization detector (FID) and a split/splitless injector. All the separations were performed on a HP-5 capillary column (30 m  $\times$  0.25mm i.d.  $\times$  0.25  $\mu\text{m}$  film thickness) (WondaCap5) was employed to identify all reaction products.

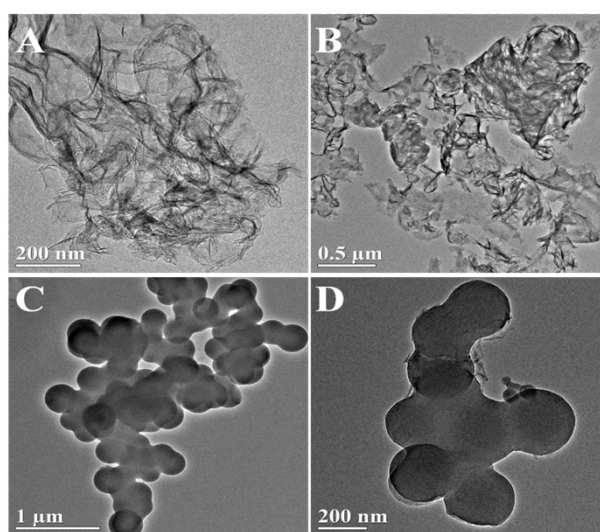

Fig. S1 The TEM pictures of NPC (A),  $\text{g-C}_3\text{N}_4$  (B), Glu (C) and  $\text{g-C}_3\text{N}_4$ -Glu (D)

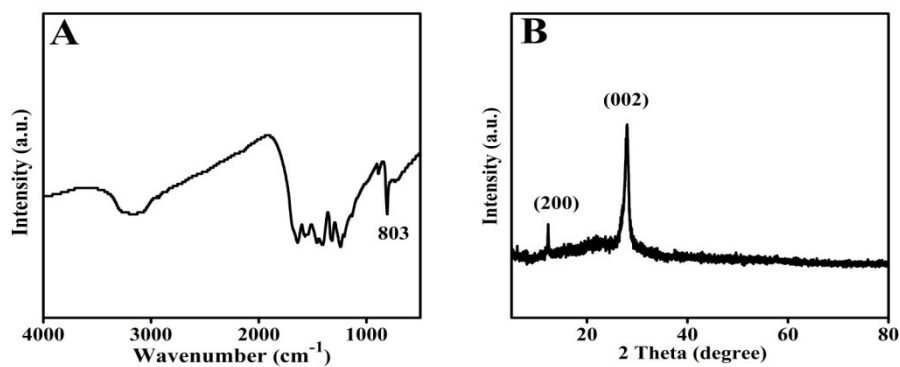

Fig S2. The FTIR spectra of g-C<sub>3</sub>N<sub>4</sub> (A) and XRD patterns of g-C<sub>3</sub>N<sub>4</sub> (B).

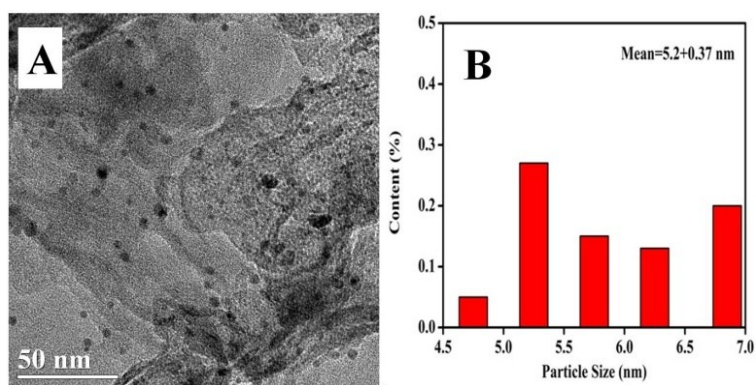

Fig S3. The TEM images of used Pd@NPC (A), and Pd particle-size distribution in the used Pd@NPC catalyst (B)

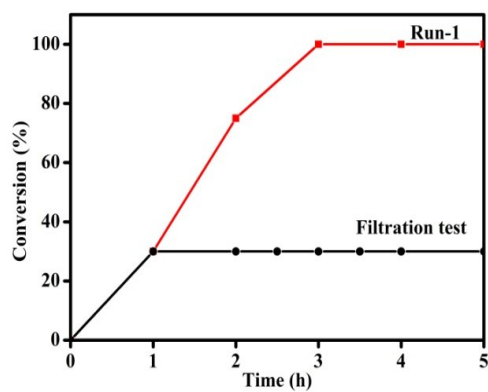

Fig. S4 Thermal filtration experiment of the Pd@NPC.

**Table S1.** Various reported catalyst tested for hydrogenation of alkenes.

| Entry | Catalyst                                                | Hydrogen source                                 | Solvent               | Tem (°C) | Time (h) | TOF (h <sup>-1</sup> ) | Reference |
|-------|---------------------------------------------------------|-------------------------------------------------|-----------------------|----------|----------|------------------------|-----------|
| 1     | cobalt catalyst                                         | i-PrOH                                          | THF                   | 100      | 24       | 0.005-0.02             | [1]       |
| 2     | Pd/CN                                                   | HCOOH                                           | H <sub>2</sub> O      | 25       | 0.25-3   | 4-53                   | [2]       |
| 3     | Pd@POP                                                  | HCOOH:Et <sub>3</sub> N                         | EtOH                  | 25       | 4-15     | 4-57                   | [3]       |
| 4     | Al <sub>2</sub> (BDC) <sub>3</sub> <sup>[b]</sup>       | N <sub>2</sub> H <sub>4</sub> ·H <sub>2</sub> O | MeCN                  | 25       | 24       | 0.07                   | [4]       |
| 5     | Cu <sub>3</sub> (BTC) <sub>2</sub> <sup>[a]</sup>       | N <sub>2</sub> H <sub>4</sub> ·H <sub>2</sub> O | MeCN                  | 25       | 24       | 0.04                   | [4]       |
| 6     | MIL-53 (Al)                                             | N <sub>2</sub> H <sub>4</sub> ·H <sub>2</sub> O | MeCN                  | 25       | 24       | 0.74                   | [5]       |
| 7     | Cu(0)@UiO-66-NH <sub>2</sub>                            | N <sub>2</sub> H <sub>4</sub> ·H <sub>2</sub> O | EtOH                  | 25       | 0.25     | 100                    | [6]       |
| 8     | HKUST-1 <sup>[c]</sup>                                  | N <sub>2</sub> H <sub>4</sub> ·H <sub>2</sub> O | MeCN                  | 25       | 24       | 1.1                    | [5]       |
| 9     | Fe <sub>3</sub> O <sub>4</sub> @GO                      | N <sub>2</sub> H <sub>4</sub> ·H <sub>2</sub> O | EtOH                  | 80       | 4-20     | 0.7-3                  | [7]       |
| 10    | Pd-g-C <sub>3</sub> N <sub>4</sub> NS/rGO <sub>20</sub> | HCOOH:HCOONH <sub>4</sub>                       | EtOH                  | 30       | 0.25-4   | 9-266                  | [8]       |
| 11    | Pd/KCC-1-NH <sub>2</sub>                                | HCOOH                                           | MeOH-H <sub>2</sub> O | 100      | 12       | 0.3-1.28               | [9]       |
| 12    | Pd@NPC                                                  | HCOOH:HCOONH <sub>4</sub>                       | EtOH                  | 50       | 0.5-9.5  | 6-132                  | This work |

[a] BTC=1,3,5-benzenetricarboxylate

[b] BDC= *p*-benzenedicarboxylate

[c] HKUST-1=MOF-199

## References

- [1] G. Zhang, Z. Yin, J. Tan, *RSC Adv.*, 2016, **6**, 22419-22423.
- [2] L. H. Gong, Y. Y. Cai, X. H. Li, Y. N. Zhang, J. Su, J. S. Chen, *Green Chem.*, 2014, **16**, 3746-3751.
- [3] H. Xue, J. Tang, H. Gong, H. Guo, X. Fan, T. Wang, J. He, Y. Yamauchi, *ACS Appl. Mater. Interfaces*, 2016, **8**, 20766-20771.
- [4] A. Dhakshinamoorthy, M. Alvaro, H. Garcia, *Adv. Synth. Catal.*, 2009, **351**, 2271-2276.
- [5] P. Garcíagarcía, M. Müller, A. Corma, *Chem. Sci.*, 2014, **5**, 2979-3007.
- [6] J. C. Wang, Y. H. Hu, G. J. Chen, Y. B. Dong, *Chem. Commun.*, 2016, **52**, 13116-13119.
- [7] J. Mondal, K. T. Nguyen, A. Jana, K. Kurniawan, P. Borah, Y. Zhao, A. Bhaumik, *Chem. Commun.*, 2014, **50**, 12095-12097.
- [8] S. Cheng, X. Meng, N. Shang, S. Gao, C. Feng, C. Wang, Z. Wang, *New J. Chem.*, 2018, **42**, 1771-1778.

[9] Z. S. Qureshi, P. B. Sarawade, M. Albert, V. D'Elia, M. N. Hedhili, K. Köhler and J.-M. Basset, *ChemCatChem*, 2015, 7, 635 – 642.
